# Supplementary material
Source: Springer Nature journal article supplement (https://www.springermedizin.de/resource/supplementary/12885_2011_3009_MOESM2_ESM.pdf/9462454)
Supplement: MOESM2 [file 9462454]

Monitoring

Circulating  
Tumor-DNA  
and CTC

Treatment

Genomic  
analyses

A

B

C

BRCA1/2  
Pharmaco-  
genetics

Histopathology

ER-positive

Triple  
negative

HER-2  
positive

Clinical  
assessment

Clinical staging

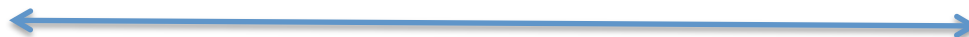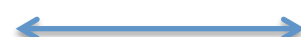

Tumor

Host
